# Supplementary material for: Drains result in greater reduction of subdural width and midline shift in burr hole evacuation of chronic subdural haematoma
Source: Springer Nature journal article supplement (doi:10.1007/s00701-020-04356-z), 2020-04-27
Supplement: MOESM1 [file 17932050]

**Supplementary table 1 Number of patients contributed per NSU**

| Hospital | Patient number<br>(n=319) | Percentage | Cumulative<br>Percentage |
|----------|---------------------------|------------|--------------------------|
| 1        | 19                        | 5.96       | 5.96                     |
| 2        | 18                        | 5.64       | 11.6                     |
| 3        | 17                        | 5.33       | 16.93                    |
| 4        | 34                        | 10.66      | 27.59                    |
| 5        | 26                        | 8.15       | 35.74                    |
| 6        | 24                        | 7.52       | 43.26                    |
| 7        | 8                         | 2.51       | 45.77                    |
| 8        | 5                         | 1.57       | 47.34                    |
| 9        | 18                        | 5.64       | 52.98                    |
| 10       | 19                        | 5.96       | 58.93                    |
| 11       | 31                        | 9.72       | 68.65                    |
| 12       | 8                         | 2.51       | 71.16                    |
| 13       | 2                         | 0.63       | 71.79                    |
| 14       | 2                         | 0.63       | 72.41                    |
| 15       | 14                        | 4.39       | 76.8                     |
| 16       | 1                         | 0.31       | 77.12                    |
| 17       | 5                         | 1.57       | 78.68                    |
| 18       | 4                         | 1.25       | 79.94                    |
| 19       | 13                        | 4.08       | 84.01                    |
| 20       | 5                         | 1.57       | 85.58                    |
| 21       | 7                         | 2.19       | 87.77                    |
| 22       | 13                        | 4.08       | 91.85                    |
| 23       | 7                         | 2.19       | 94.04                    |
| 24       | 2                         | 0.63       | 94.67                    |
| 25       | 8                         | 2.51       | 97.18                    |
| 26       | 9                         | 2.82       | 100                      |

**Supplementary table 2 Comparison of pertinent characteristics of 683 patients who underwent burr-hole drainage of CSDH with and without postoperative imaging**

|                                                 | No postop<br>imaging | Postop<br>imaging | P value |
|-------------------------------------------------|----------------------|-------------------|---------|
| Number of patients                              | 364                  | 319               |         |
| Age (median; IQR)                               | 78 (69-85)           | 77 (66-84)        | 0.46    |
| Pre-op GCS                                      |                      |                   | 0.5     |
| 3-8                                             | 9 (2.5%)             | 17 (5.3%)         |         |
| 9-12                                            | 46 (12.6%)           | 41 (12.9%)        |         |
| 13-15                                           | 309 (84.9%)          | 309 (84.9%)       |         |
| Time to operation, median (IQR)                 | 1 (1-3)              | 1 (1-3)           | 0.73    |
| Drain Insertion                                 |                      |                   | 0.47    |
| No                                              | 59 (16.2%)           | 45 (14.2%)        |         |
| Yes                                             | 305 (83.8%)          | 272 (85.8%)       |         |
| Pre-operative maximum width in mm,<br>mean (SD) | 25.4 (10.5)          | 26.1 (11.1)       | 0.4     |
| Pre-operative maximum MLS in mm,<br>mean (SD)   | 8.2 (6.5)            | 7.9 (4.9)         | 0.56    |
| Recurrence                                      | 23 (6.5%)            | 38 (12.2%)        | 0.012   |

**Supplementary table 3 Baseline characteristics of 683 patients who underwent burr-hole drainage of CSDH (including patients with pre-operative scans only)**

|                                         | Total (n=319) |
|-----------------------------------------|---------------|
| Age (median; IQR)                       | 77 (67-84)    |
| Gender                                  |               |
| Female                                  | 219 (32.1)    |
| Male                                    | 464 (67.9)    |
| Medical comorbidities                   |               |
| Diabetes mellitus                       | 113 (16.5)    |
| Dementia                                | 76 (11.1)     |
| COPD                                    | 37 (5.4)      |
| Cerebrovascular event                   | 110 (16.1)    |
| Ischaemic heart disease                 | 173 (25.3)    |
| Arrhythmia                              | 138 (20.2)    |
| Epilepsy                                | 30 (4.4)      |
| CSF shunt                               | 7 (1.0)       |
| Malignancy                              | 59 (8.6)      |
| Metallic heart valve                    | 14 (2.1)      |
| History of head injury in past 3 months | 427 (62.5)    |
| Prior antithrombotic use                | 285 (41.7)    |
| Prior antiplatelet use                  | 161 (23.6)    |
| Prior warfarin use                      | 125 (18.3)    |
| Other antithrombotics                   | 11 (1.6)      |

**Supplementary table 4 Perioperative characteristics of 683 patients who underwent burr-hole drainage of CSDH (including patients with pre-operative scans only)**

|                                    | Total (n=319) |
|------------------------------------|---------------|
| Pre-operative platelet transfusion | 64 (9.4)      |
| Pre-operative vitamin K            | 108 (15.8)    |
| Pre-operative FFP                  | 14 (2.1)      |
| Pre-operative GCS (median, IQR)    | 14 (14-15)    |
| GCS 3-8                            | 26 (3.8)      |
| GCS 9-12                           | 87 (12.7)     |
| GCS 13-15                          | 570 (83.5)    |
| Pre-operative mRS                  |               |
| mRS 0-3                            | 400 (58.6)    |
| mRS 4-5                            | 283 (41.4)    |
| CSDH laterality                    |               |
| Left                               | 270 (39.5)    |
| Right                              | 238 (34.9)    |
| Bilateral                          | 158 (23.1)    |
| Unknown/missing                    | 17 (2.5)      |
| Timing of operation                |               |
| Within 2 days of referral          | 481 (70.4)    |
| After 2 days of referral           | 181 (26.5)    |
| Unknown/missing                    | 21 (3.1)      |
| Number of burr hole(s)             |               |
| Single burr hole                   | 55 (8.1)      |
| >1 burr holes                      | 626 (91.7)    |
| Unknown/missing                    | 2 (0.3)       |
| Post-operative bed rest            |               |
| No specific instructions           | 271 (39.7)    |
| 1-12 hours                         | 46 (6.7)      |
| 12-24 hours                        | 256 (37.5)    |
| 24-48 hours                        | 99 (14.5)     |
| 48+ hours                          | 9 (1.3)       |
| Unknown/missing                    | 2 (0.3)       |
| Post-operative imaging*            |               |
| Routine                            | 184 (58.0)    |
| Due to concerns                    | 133 (42.0)    |

\*318 patients had post-operative imaging

**Supplementary table 5 Radiological characteristics of 683 patients who underwent burr-hole drainage of CSDH (including patients with pre-operative scans only)**

|                                                              | Total*<br>(n=683) | Unilateral<br>(n=508) | Bilateral<br>(n=158) |
|--------------------------------------------------------------|-------------------|-----------------------|----------------------|
| CSDH density on initial CT scan                              |                   |                       |                      |
| Hypodense                                                    | 209 (30.1)        | 153 (30.1)            | 50 (31.7)            |
| Isodense                                                     | 138 (20.2)        | 103 (20.3)            | 31 (19.6)            |
| Mixed                                                        | 336 (49.2)        | 252 (49.6)            | 77 (48.7)            |
| Presence of membrane on CT scan                              |                   |                       |                      |
| Yes                                                          | 259 (37.9)        | 197 (38.8)            | 56 (35.4)            |
| No                                                           | 424 (62.1)        | 311 (61.2)            | 102 (64.6)           |
| Pre-operative maximal width (mm)                             | 25 (18-30)        | 22 (17-28)            | 35 (25-44)           |
| Pre-operative midline shift (mm)†                            | 8 (5-11)          | 9 (6-12)              | 3 (0-6)              |
| Time to operation (days)                                     | 1 (1-3)           | 1 (1-2.5)             | 2 (1-3)              |
| Days between operation and post-operative scan (median; IQR) | 2 (1-4)           | 2 (1-4)               | 2 (1-4)              |
| Post-operative maximal width (mm)                            | 14 (9-21)         | 13 (8-19)             | 20 (12-29)           |
| Change in maximal width (mm)                                 |                   |                       |                      |
| Median (IQR)                                                 | 10 (5-15)         | 9 (5-14)              | 13 (7-20)            |
| Reduced width                                                | 288 (90.9)        | 202 (90.6)            | 79 (91.9)            |
| Same or increased width                                      | 29 (9.2)          | 21 (9.4)              | 7 (8.1)              |
| Change in midline shift (mm)                                 |                   |                       |                      |
| Median (IQR)                                                 | 4 (1-6)           | 5 (2-7)               | 2 (0-4)              |
| Reduced shift                                                | 256 (80.8)        | 192 (86.1)            | 56 (65.1)            |
| Same or increased shift                                      | 61 (19.2)         | 31 (13.9)             | 30 (34.9)            |

\*17 patients had missing data on operative laterality

†Maximal width in bilateral cases is the sum of the maximal width on each side

**Supplementary table 6 Recurrence and Functional Outcome in 683 patients who underwent burr-hole drainage of CSDH (including patients with pre-operative scans only)**

|                                          | Total*<br>(n=683) | Unilateral<br>(n=508) | Bilateral<br>(n=158) |
|------------------------------------------|-------------------|-----------------------|----------------------|
| <b>Recurrence</b>                        |                   |                       |                      |
| No recurrence                            | 604 (88.4)        | 451 (88.8)            | 139 (88.0)           |
| Recurrence occurred                      | 61 (8.9)          | 44 (8.7)              | 15 (9.5)             |
| Unknown/missing                          | 18 (2.6)          | 13 (2.6)              | 4 (2.5)              |
| <b>Discharge functional status (mRS)</b> |                   |                       |                      |
| mRS 0-3                                  | 516 (75.6)        | 381 (75.0)            | 119 (75.3)           |
| mRS 4-6                                  | 149 (21.8)        | 114 (22.4)            | 35 (22.2)            |
| Unknown/missing                          | 18 (2.6)          | 13 (2.6)              | 4 (2.5)              |

\*17 patients had missing data on operative laterality

**Supplementary table 7 Unadjusted odds ratio for recurrence and unfavourable functional outcome at discharge in 683 patients who underwent burr-hole drainage of CSDH (including patients with pre-operative scans only)**

|                                 | Recurrence |           |         | Unfavourable functional outcome |           |         |
|---------------------------------|------------|-----------|---------|---------------------------------|-----------|---------|
|                                 | OR         | 95% CI    | P-value | OR                              | 95% CI    | P-value |
| <b>Density on CT</b>            |            |           |         |                                 |           |         |
| Hypodense                       | Ref        | -         | -       | Ref                             | -         | -       |
| Isodense                        | 0.95       | 0.43-2.11 | 0.91    | 0.45                            | 0.25-0.81 | 0.01    |
| Mixed                           | 1.20       | 0.65-2.21 | 0.57    | 0.81                            | 0.54-1.22 | 0.32    |
| Presence of membrane on CT scan | 1.32       | 0.77-2.24 | 0.31    | 0.96                            | 0.66-1.40 | 0.83    |
| Pre-operative maximal width     | 1.02       | 1.00-1.05 | 0.06    | 1.01                            | 0.99-1.02 | 0.51    |
| Pre-operative maximal shift     | 1.01       | 0.97-1.06 | 0.63    | 1.00                            | 0.97-1.03 | 0.80    |
| Post-operative maximal width    | 1.07       | 1.04-1.11 | <0.01   | 1.03                            | 1.00-1.05 | 0.04    |
| Post-operative maximal shift    | 1.28       | 1.18-1.40 | <0.01   | 1.13                            | 1.06-1.20 | <0.01   |
| Change in maximal width         | 0.92       | 0.88-0.95 | <0.01   | 0.95                            | 0.92-0.98 | <0.01   |
| Change in maximal shift         | 0.86       | 0.79-0.93 | <0.01   | 0.93                            | 0.88-0.99 | 0.02    |

**Supplementary table 8a Adjusted odds ratios for recurrence within 60 days using multiple logistic regression model based on 644 patients who underwent burr-hole drainage of CSDH with complete data (including patients with pre-operative scans only)**

|                                  | OR   | 95% CI    | P-value |
|----------------------------------|------|-----------|---------|
| Drain inserted                   | 0.39 | 0.21-0.73 | <0.01   |
| Pre-operative GCS (13-15)        | 0.43 | 0.24-0.77 | <0.01   |
| Pre-operative maximal width (mm) | 1.03 | 1.00-1.05 | 0.02    |
| Pre-operative maximal shift (mm) | 1.01 | 0.97-1.05 | 0.72    |

**Supplementary table 8b Adjusted odds ratios for functional outcome at discharge using multiple logistic regression model based on 644 patients who underwent burr-hole drainage of CSDH with complete data (including patients with pre-operative scans only)**

|                                  | OR   | 95% CI    | P-value |
|----------------------------------|------|-----------|---------|
| Age                              | 1.08 | 1.05-1.10 | <0.01   |
| Pre-operative mRS (mRS 4-5)      | 4.05 | 0.53-6.47 | <0.01   |
| Pre-operative GCS (13-15)        | 0.38 | 0.24-0.62 | <0.01   |
| Drain inserted                   | 0.53 | 0.29-0.98 | 0.04    |
| >1 burr-hole                     | 0.45 | 0.22-0.94 | 0.03    |
| Post-operative bed rest          |      |           |         |
| 1-12 hours                       | 1.19 | 0.46-3.09 | 0.72    |
| 12-24 hours                      | 1.39 | 0.85-2.29 | 0.19    |
| 24-48hrs                         | 1.54 | 0.82-2.90 | 0.18    |
| >48hrs                           | 7.41 | 0.93-59.3 | 0.06    |
| Pre-operative maximal width (mm) | 0.99 | 0.97-1.01 | 0.37    |
| Pre-operative maximal shift (mm) | 0.98 | 0.94-1.03 | 0.45    |

**Supplementary table 8c Adjusted odds ratios for functional outcome at discharge using multiple logistic regression model based on 644 patients who underwent burr-hole drainage of CSDH with complete data (including patients with pre-operative scans only); this includes clot density as a variable**

|                                  | OR   | 95% CI    | P-value |
|----------------------------------|------|-----------|---------|
| Age                              | 1.08 | 1.05-1.10 | <0.01   |
| Pre-operative mRS (mRS 4-5)      | 3.99 | 2.49-6.39 | <0.01   |
| Pre-operative GCS (13-15)        | 0.38 | 0.23-0.62 | <0.01   |
| Density on initial CT scan       |      |           |         |
| Hypodense                        | Ref  | -         | -       |
| Isodense                         | 0.66 | 0.34-1.28 | 0.34    |
| Mixed                            | 0.67 | 0.41-1.08 | 0.41    |
| Drain inserted                   | 0.56 | 0.30-1.04 | 0.07    |
| >1 burr-hole                     | 0.46 | 0.22-0.96 | 0.04    |
| Post-operative bed rest          |      |           |         |
| 1-12 hours                       | 1.13 | 0.43-2.94 | 0.81    |
| 12-24 hours                      | 1.35 | 0.82-2.23 | 0.24    |
| 24-48hrs                         | 1.60 | 0.84-3.02 | 0.15    |
| >48hrs                           | 7.68 | 0.98-60.2 | 0.05    |
| Pre-operative maximal width (mm) | 0.99 | 0.97-1.01 | 0.48    |
| Pre-operative maximal shift (mm) | 0.98 | 0.94-1.03 | 0.52    |
